# Supplementary material for: JNK1 phosphorylation of SCG10 determines microtubule dynamics and axodendritic length
Source: PubMed Central journal article supplement — J Cell Biol. 2006 Apr 24;173(2):265–77. doi: 10.1083/jcb.200511055 (PMC2063817; doi:10.1083/jcb.200511055), 2006-04-24
Supplement: jcellbiol_jcb.200511055_4.pdf [file jcellbiol_jcb.200511055_4.pdf]

Tararuk et al., <http://www.jcb.org/cgi/doi/10.1083/jcb.200511055>

## Supplemental materials and methods

### Reporter gene expression

GAL4 fusion protein activity was measured as previously described (Coffey et al., 2000). Cerebellar granule neurons at 6 d in vitro were transfected with a firefly luciferase reporter plasmid driven by five GAL4 elements in tandem with pGL3-G5E4Δ38, GAL4-Jun(5–105), and pRL-CMV (Promega) as an internal standard against which signals were normalized. In addition, cells were transfected with pEGFP-NES-JBD (50%) or pEGFP (50%). 20 h after transfection, cells were transferred to low (5 mM) KCl-containing medium (*trophic withdrawal*) for 4 h and then lysed. Firefly (reporter) and Renilla (internal standard) luciferase activities were assayed with the dual luciferase assay kit (Promega).

### Immunofluorescence staining

Immunocytochemical staining was performed as previously described (Coffey et al., 2000). Coverslips of cortical neurons were fixed in 4% paraformaldehyde (20 min) and permeabilized in PBS/Triton X-100 (1%) for 3 min. After washing with PBS, samples were blocked with 10% serum containing 0.2% Tween-20 in PBS for 1 h. Incubation with primary antibodies was overnight at 4°C using 1:1,000 α-SCG10, 1:1,000 α-P-SCG10, 1:150 α-tubulin (KMX-1; Cedarlane Laboratories), or 1:100 α-PJNK (Cell Signaling Technology). Tubulin immunoreactivity was detected with 1:500 α-mouse Alexa-568 (Invitrogen) and SCG10 and PJNK with 1:500 α-rabbit Alexa-488 (Invitrogen). P-SCG10 immunoreactivity was amplified using 1:800 goat α-rabbit biotin (Sigma-Aldrich) and 1:1,500 streptavidin Alexa-488 (Invitrogen). Slides were scanned with an argon 488 and HeNe 543 laser using a laser-scanning confocal microscope (META 510; Carl Zeiss Microimaging, Inc.).

### Immunohistochemistry

Day 15.5 mouse embryos were fixed for 24 h in 4% paraformaldehyde before paraffin embedding. Slide-mounted sections (6 μm) were blocked with Vectastain blocking reagent and stained with JNK1 (G151-333; 1:500; CLONTECH Laboratories, Inc.), PJNK (1:500; Promega), SCG10 (1:5,000), GFAP (1:1,000), corresponding preimmune serum (1:5,000) or P-SCG10 (1:1,000). GFAP/peptide block JNK1 and P-SCG10 immunoreactivity was amplified using biotin-conjugated tyramide (1:100) and SCG10 and PJNK with biotin anti-rabbit (1:800; Sigma-Aldrich). Immunoreactivity was detected with streptavidin-conjugated horseradish peroxidase and 3,3'-diaminobenzidine tetrahydrochloride (Sigma-Aldrich) as substrate. Sections were counterstained with Meyer's hematoxylin (Sigma-Aldrich). Sections were examined using a microscope (BX60; Olympus), and images of telencephalon were taken using a colored charge-coupled device camera (U-CMAD-2; Olympus). Staining specificity was tested by immunoblotting of 25 microdissected sections (30 μm thickness) of mouse embryonic day 15.5 cortical plate, intermediate zone, and ventricular zone.

### FRAP

Cortical neurons at 2 d in vitro were transfected with pVenus-α-tubulin, pECFP-SCG10AA, pCDNA3-Flag-JBD, or pECFP as shown. 48 h after transfection, cells were incubated in a CO<sub>2</sub>, humidity-regulated chamber and imaged using a laser-scanning microscope at 37°C. 10 prebleach scans were followed by photobleaching of a 20-μm<sup>2</sup> fixed area of the neurite using 200 iterations of a 488-nm laser set at 100% transmission and maximum power. After bleaching, images were scanned using a 4% transmission 514-nm laser and a 0.1% transmission 488-nm laser and Venus fluorescence was detected at 529–593 nm using the META detector. Maximum scan speed, 512 x 512 resolution, and a 40x oil objective (NA 1.3) were used. For each experiment, a background region and a region encompassing almost the entire image were scanned in addition to the bleached region. These regions were used to calculate background intensity and fading using a linear regression. Corrected data is shown. Kinetic plots were created by fitting the corrected raw data to the equation  $y = a(1 - \exp[-kt])$  as previously described (Phair and Misteli, 2001). Mobile fractions were calculated as described previously (Beaudouin et al., 2002).

### Subcellular fractionation

Postnatal day 7 rat forebrain was homogenized using a homogenizer (Potter-Elvehjem) in buffer containing 320 mM sucrose; 20 mM Tricine-NaOH, pH 7.8; 1 mM EDTA; 2 mM MgCl<sub>2</sub>; 1 μg/ml leupeptin, pepstatin, and aprotinin; 100 μg/ml PMSF; and 50 mM β-glycerophosphate. Homogenate was precleared by spinning at 800 g for 10 min at 4°C to yield P1. The remaining supernatant (S1) was centrifuged at 16,000 g for 30 min at 4°C to yield P2 and S2. S2 was further centrifuged at 200,000 g for 20 min at 4°C to yield P3. Equal proportions of homogenate, S1, P1, S2, P2, S3, and P3 were analyzed by SDS-PAGE.

## References

- Beaudouin, J., D. Gerlich, N. Daigle, R. Eils, and J. Ellenberg. 2002. Nuclear envelope breakdown proceeds by microtubule-induced tearing of the lamina. *Cell*. 108: 83–96.
- Phair, R.D., and T. Misteli. 2001. Kinetic modelling approaches to in vivo imaging. *Nat. Rev. Mol. Cell Biol.* 2:898–907.
